# Supplementary material for: The microbial metabolite butyrate enhances the effector and memory functions of murine CD8+ T cells and improves anti-tumor activity
Source: Frontiers journal article supplement (doi:10.3389/fmed.2025.1577906), 2025-06-24
Supplement: Data_Sheet_1.pdf [file Data_Sheet_1.pdf]

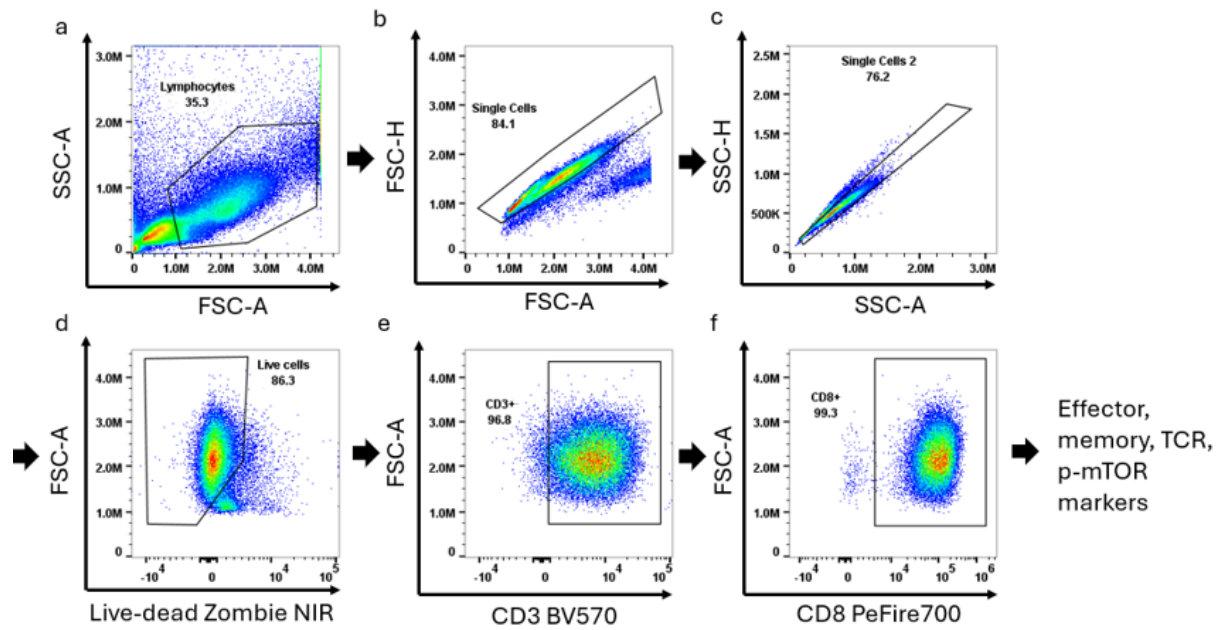

**Supplementary Figure 1 : Representative gating strategy for CD8<sup>+</sup> T cell analysis of effector, memory, and TCR markers.** For p-Mtor experiments gating strategy did not include CD3 gate. (a) FSC-A vs SSC-A profile for gating of lymphocytes (b) Single cell gating based on FSC-A vs FSC-H (c) Single cell gating based on SSC-A vs SSC-H (d) Gating of live cells based on low staining for Zombie NIR viability dye (e) gating of CD3<sup>+</sup> cells (f) gating of CD8<sup>+</sup> T cells. All markers were gated directly downstream of CD8 gate. Example above is from cells treated in vitro with IL-2, anti-CD3 and anti-CD28, and butyrate for 3 days.
