# Supplementary material for: The microbial metabolite butyrate enhances the effector and memory functions of murine CD8+ T cells and improves anti-tumor activity
Source: Frontiers journal article supplement (doi:10.3389/fmed.2025.1577906), 2025-06-24
Supplement: Data_Sheet_4.pdf [file Data_Sheet_4.pdf]

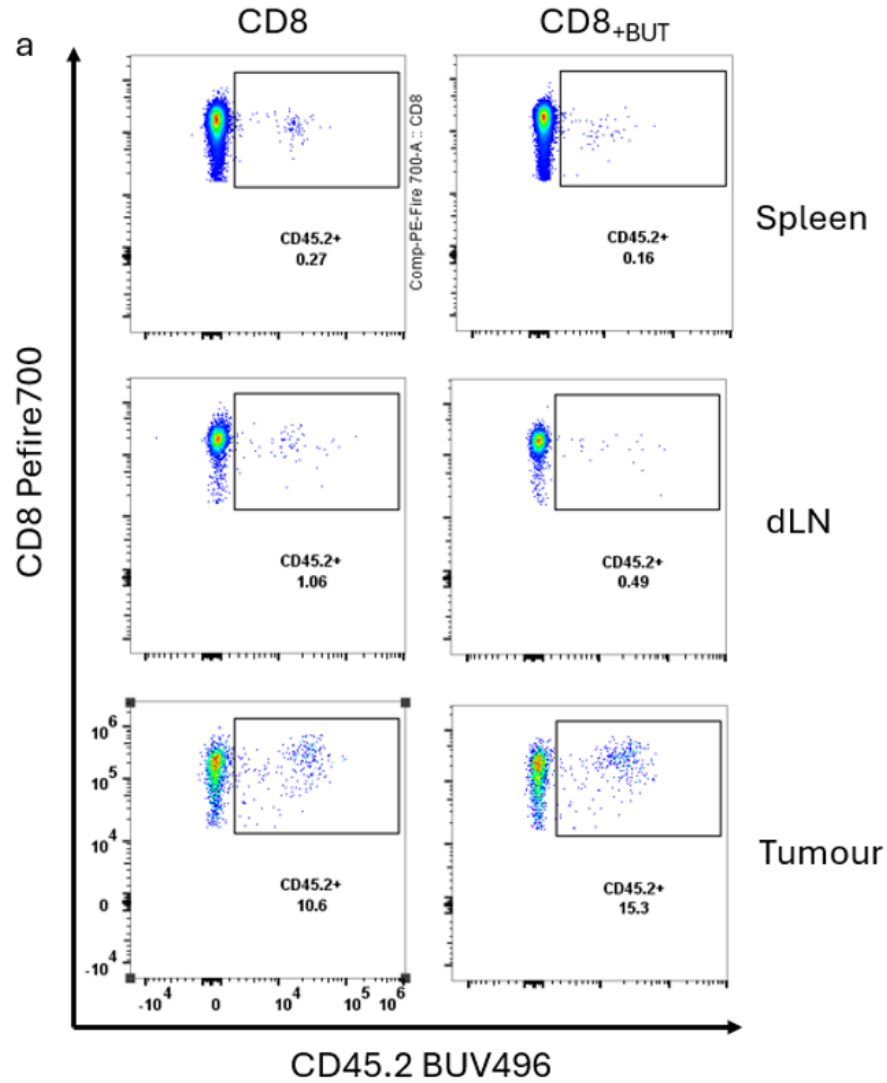

**Supplementary Figure 4 : Representative gating for donor CD45.2+CD8+ T cells *ex vivo*.** Spleen, tumour draining lymph node (dLN) and tumour were isolated from Ptp mice 20 days after tumour injection. Tissues were processed into single-cell suspensions, treated with fluorescent antibodies and analysed via flow cytometry. Cells were pre-gated to CD8+ T cells according to the gating strategy in supplementary figure 3 (a) Gating of CD45.2+ cells from the spleen (top), tumour draining lymph node (middle) and tumour (bottom) of mice transferred with activated OT-I CD8+ T cells treated with or without butyrate.
